# Supplementary material for: Profiling gut microbiota and bile acid metabolism in critically ill children
Source: Springer Nature journal article supplement (doi:10.1038/s41598-022-13640-0), 2022-06-21

# *Profiling gut microbiota and bile acid metabolism in critically ill children*

Article

Supplemental Material

Creative Commons: Attribution 4.0 (CC-BY)

Open Access

Kean, I. R. L., Wagner, J., Wijeyesekera, A. ORCID: <https://orcid.org/0000-0001-6151-5065>, De Goffau, M., Thurston, S., Clark, J. A., White, D. K., Ridout, J., Agrawal, S., Kayani, R., O'Donnell, R., Ramnarayan, P., Peters, M. J., Klein, N., Holmes, E., Parkhill, J., Baker, S. and Pathan, N. (2022) Profiling gut microbiota and bile acid metabolism in critically ill children. *Scientific Reports*, 12 (1). 10432. ISSN 2045-2322 doi: <https://doi.org/10.1038/s41598-022-13640-0> Available at <https://centaur.reading.ac.uk/105774/>

It is advisable to refer to the publisher's version if you intend to cite from the work. See [Guidance on citing](#).

To link to this article DOI: <http://dx.doi.org/10.1038/s41598-022-13640-0>

Publisher: Nature Publishing Group UK

All outputs in CentAUR are protected by Intellectual Property Rights law, including copyright law. Copyright and IPR is retained by the creators or other copyright holders. Terms and conditions for use of this material are defined in the [End User Agreement](#).

[www.reading.ac.uk/centaur](http://www.reading.ac.uk/centaur)

**CentAUR**

Central Archive at the University of Reading

Reading's research outputs online

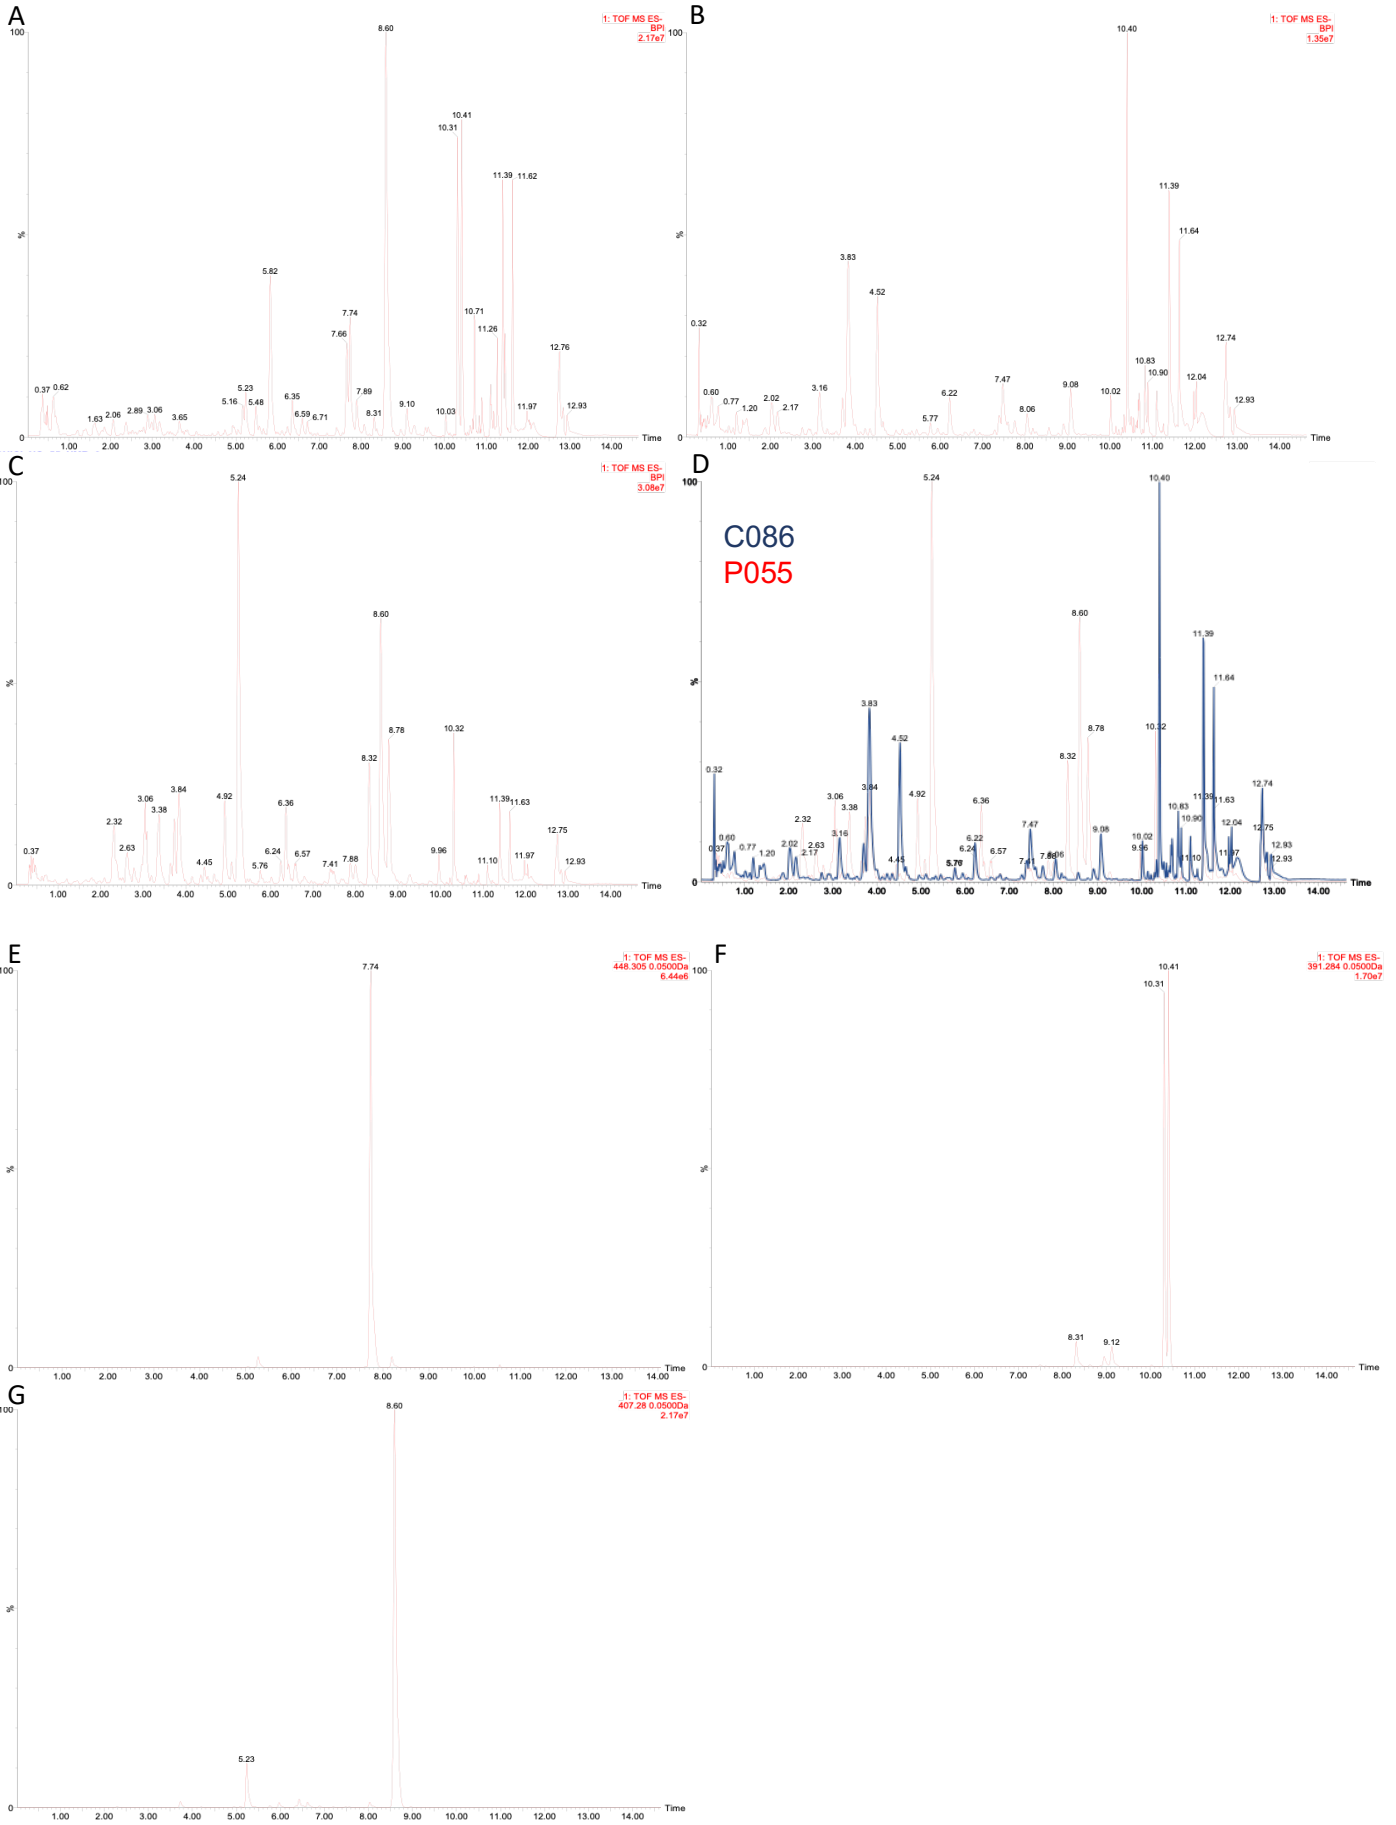

Supplement: MOESM8 [file 41598_2022_13640_MOESM8_ESM.pdf]
